# Supplementary material for: In situsynthesis of graphitic C3N4–poly(1,3-dioxolane) composite interlayers for stable lithium metal anodes
Source: Royal Society of Chemistry journal article supplement (doi:10.1039/d1se00212k), 2021-01-01
Supplement: d1se00212k1.pdf [file d1se00212k1.pdf]

## Supporting Information

In-situ form graphitic  $C_3N_4$ -PDOL composite interlayer toward stable lithium metal

anodes

Zilong Zhuang,<sup>1,2</sup> Yating Tang,<sup>1</sup> Bowei Ju,<sup>1,\*</sup> Tete He<sup>1</sup>, Feiyue Tu<sup>1,\*</sup>

<sup>1</sup>Changsha Research Institute of Mining and Metallurgy, Changsha, 410012, China

<sup>2</sup>Department of Chemistry, Fudan University, Shanghai, 200082, China

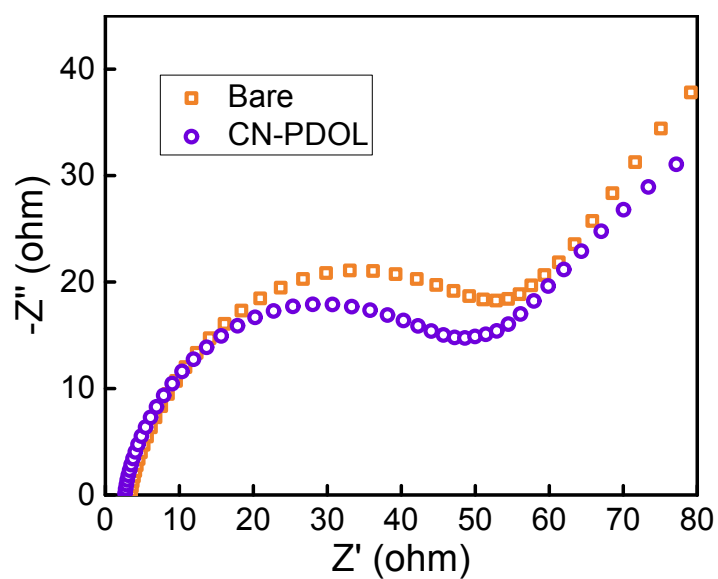

Fig. S1 EIS spectra of NMC532|Bare-Li and NMC532|CN-PDOL-Li before cycling.

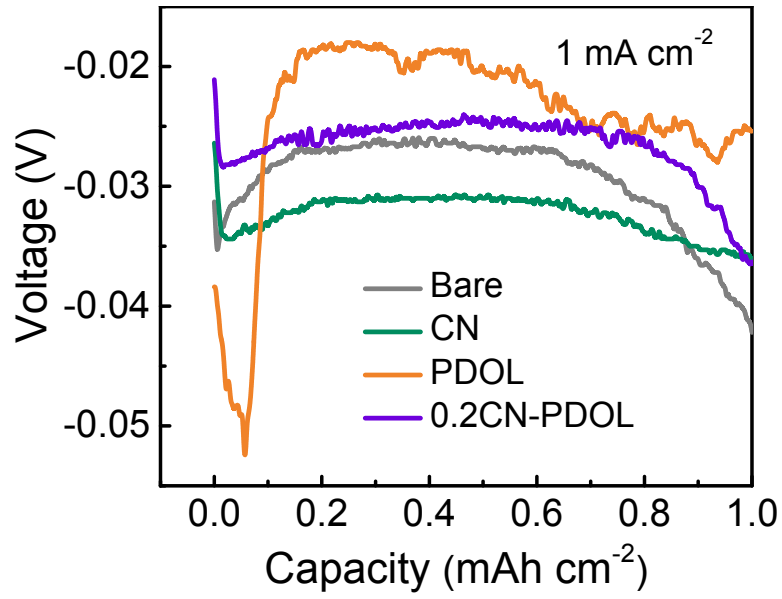

Fig. S2 Voltage profiles during Li nucleation on different samples at  $1 \text{ mA cm}^{-2}$  to  $1 \text{ mAh cm}^{-2}$ .

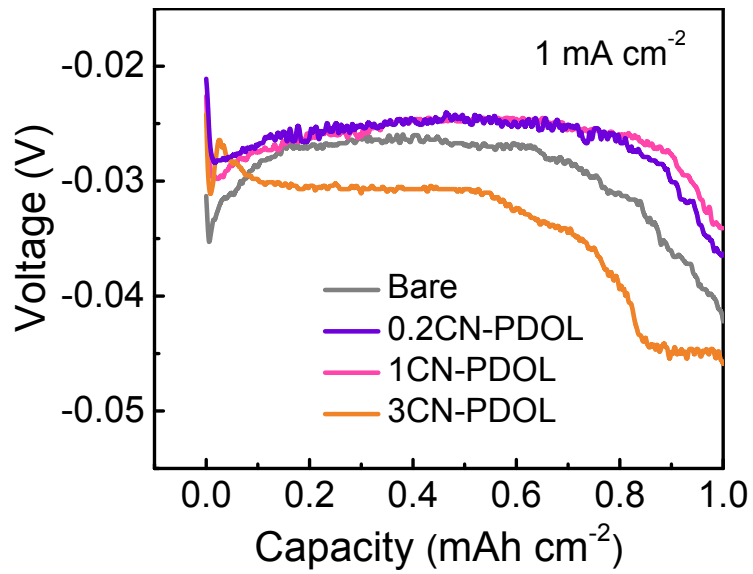

Fig. S3 Voltage profiles during Li nucleation on bare Li and CN-PDOL-Li at  $1 \text{ mA cm}^{-2}$  to  $1 \text{ mAh cm}^{-2}$ .

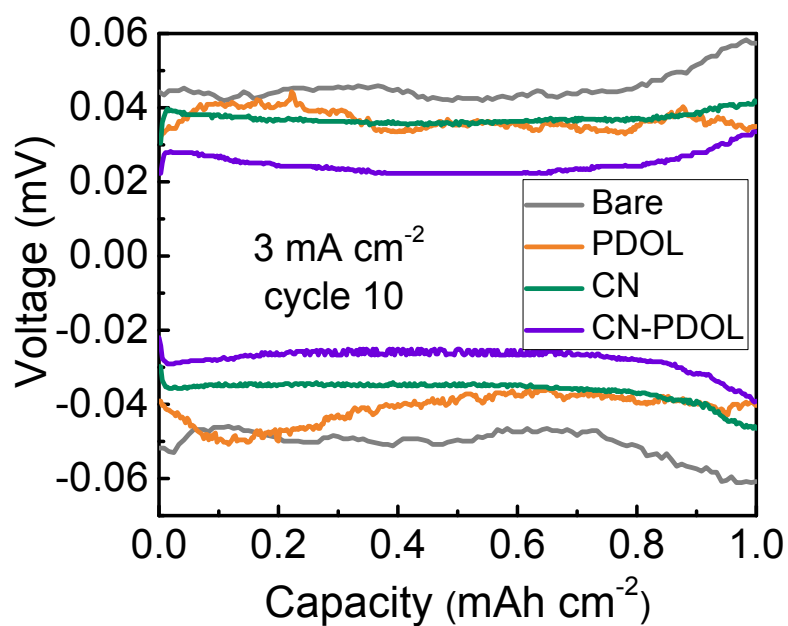

Fig. S4 Voltage profiles at 10th cycle of bare-Li, PDOL-Li, CN-Li, CN-PDOL-Li with a cycling capacity of  $3 \text{ mA cm}^{-2}$  to  $1 \text{ mAh cm}^{-2}$ .

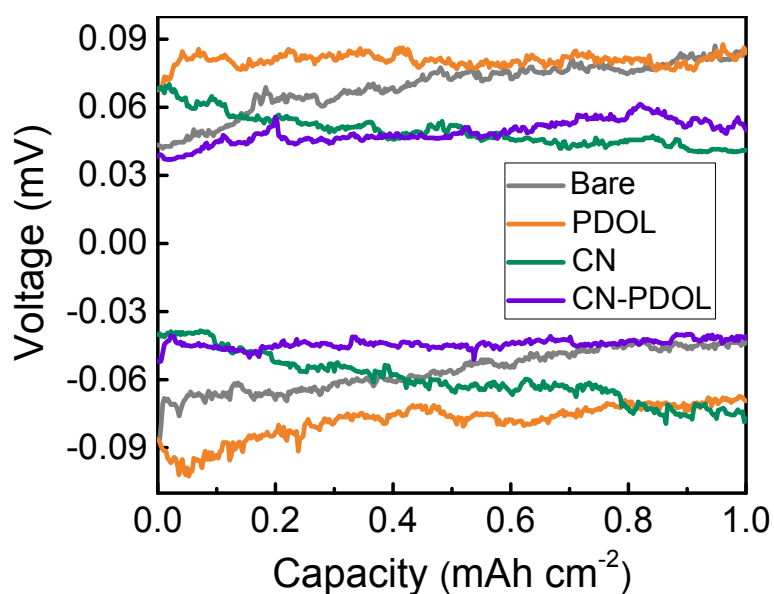

Fig. S5 Voltage profiles of bare-Li, PDOL-Li, CN-Li, CN-PDOL-Li with a cycling capacity of  $3 \text{ mA cm}^{-2}$  for a total  $1 \text{ mAh cm}^{-2}$  of Li at 200th cycle.

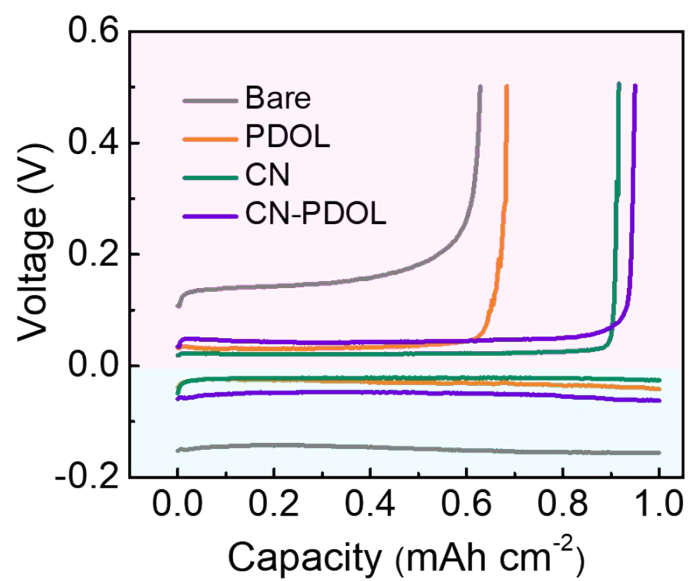

Fig. S6 charge-discharge profiles of Li-Cu cells with a cycling capacity of 1 mA cm<sup>-2</sup> for a total 1 mAh cm<sup>-2</sup> of Li at 40th cycle.

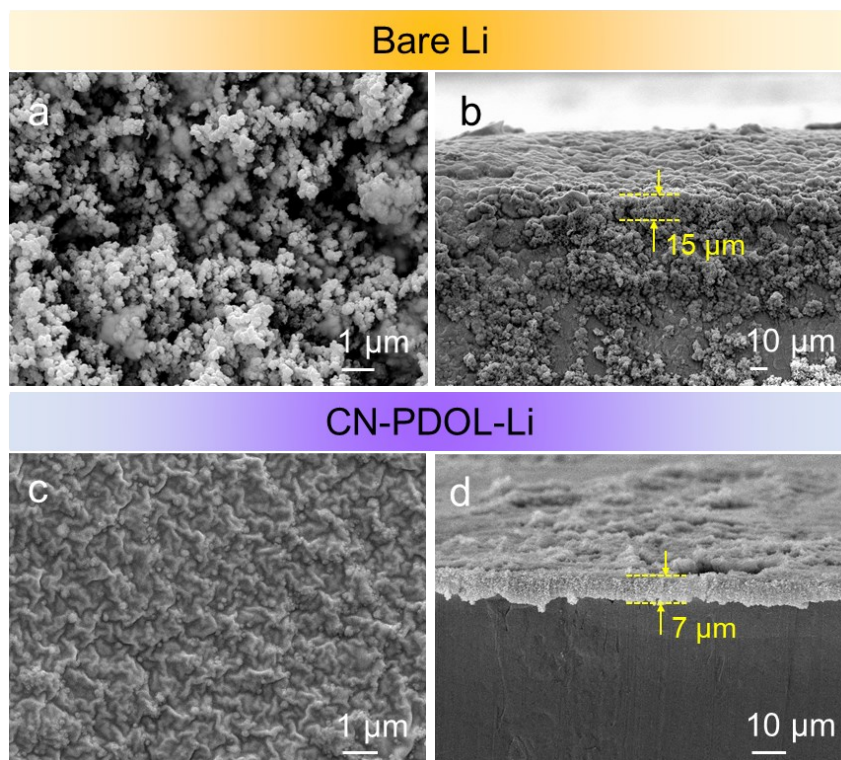

Fig. S7 SEM images of Li deposited on bare Li and CN-PDOL-Li of Li-Li symmetric cells after 10 cycles with a current density of  $1 \text{ mA cm}^{-2}$  for a total  $1 \text{ mAh cm}^{-2}$  of Li. (a) Top view and (b) cross-section of bare Li; (c) Top view and (d) cross-section of CN-PDOL-Li.

Table S1 The cycle performance comparison of reported Li symmetry cells and this work.

| Electrode             | Cycle | Overpotential (mV) | Current density (mA cm <sup>-2</sup> ) | Capacity (mAh cm <sup>-2</sup> ) | Ref.      |
|-----------------------|-------|--------------------|----------------------------------------|----------------------------------|-----------|
| PDOL-Li               | 200   | 50                 | 1                                      | 1                                | 1         |
| SR-G-Li               | 400   | 50                 | 5                                      | 1                                | 2         |
| NPCC-Li               | 240   | 100                | 5                                      | 1                                | 3         |
| M-Li                  | 200   | 50                 | 1                                      | 1                                | 4         |
| Li <sub>x</sub> Si-Li | 400   | ~120               | 1                                      | 1                                | 5         |
| LDP-Li                | 220   | ~20                | 1                                      | 1                                | 6         |
| 3D L-G-Li             | 80    | 200                | 5                                      | 1                                | 7         |
| CN-PDOL-Li            | 850   | 70                 | 3                                      | 1                                | This work |

## References

- 1 Q. Zhao, X. Liu, S. Stalin, K. Khan and L. A. Archer, *Nat. Energy*, 2019, **4**, 365-373.
- 2 M. Bai, K. Xie, K. Yuan, K. Zhang, N. Li, C. Shen, Y. Lai, R. Vajtai, P. Ajayan and B. Wei, *Adv. Mater.*, 2018, **30**, 1801213.
- 3 K. Li, Z. Hu, J. Ma, S. Chen, D. Mu and J. Zhang, *Adv. Mater.*, 2019, **31**, e1902399.
- 4 D. Wang, C. Luan, W. Zhang, X. Liu, L. Sun, Q. Liang, T. Qin, Z. Zhao, Y. Zhou, P. Wang and W. Zheng, *Adv. Energy Mater.*, 2018, **8**, 1800650.
- 5 W. Tang, X. Yin, S. Kang, Z. Chen, B. Tian, S. L. Teo, X. Wang, X. Chi, K. P. Loh, H. W. Lee and G. W. Zheng, *Adv. Mater.*, 2018, **30**, 1801745.
- 6 X. Shen, T. Qian, P. Chen, J. Liu, M. Wang and C. Yan, *ACS Appl. Mater. Interfaces*, 2018, **10**, 30058-30064.
- 7 W. Deng, X. Zhou, Q. Fang and Z. Liu, *Adv. Energy Mater.*, 2018, **8**, 1703152.
